# Supplementary material for: Dcsbis (PA2771) from Pseudomonas aeruginosa is a highly active diguanylate cyclase with unique activity regulation
Source: PubMed Central journal article supplement (PMC4937426; doi:10.1038/srep29499), 2016-07-08
Supplement: srep29499-s1.pdf [file srep29499-s1.pdf]

**Dcsbis (PA2771) from *Pseudomonas aeruginosa* is a highly active diguanylate cyclase with unique activity regulation**

Ying Chen<sup>1,4,5</sup>, Shiheng Liu<sup>1,4</sup>, Cuilan Liu<sup>2,4</sup>, Yan Huang<sup>1,4</sup>, Kaikai Chi<sup>1</sup>, Tiantian Su<sup>1</sup>, Deyu Zhu<sup>1</sup>, Jin Peng<sup>1</sup>, Zhijie Xia<sup>3</sup>, Jing He<sup>1</sup>, Sujuan Xu<sup>1</sup>, Wei Hu\*<sup>1</sup> and Lichuan Gu\*<sup>1</sup>

<sup>1</sup>State Key Laboratory of Microbial Technology, School of Life Sciences, Shandong University, Jinan, Shandong, 250100, China

<sup>2</sup>College of Life Sciences, Shandong Normal University, Jinan, Shandong, 250014, China

<sup>3</sup>Institute for metabolic and neuropsychiatric disorders, Binzhou Medical University, Binzhou, Shandong, 256600, China

<sup>4</sup>These authors contributed equally to this work.

<sup>5</sup>Present address: Max Planck Institute for Developmental Biology, Dept of Biochemistry, Tübingen, Germany

\*To whom correspondence should be addressed. Tel: (86) 531-88362039; Fax: (86) 531-88362039; E-mail: lcg@[sdu.edu.cn](mailto:lcgu@sdu.edu.cn) for LG and Tel: (86) 531-88364288; Fax: (86) 531-88364288; E-mail: [hw\\_1@sdu.edu.cn](mailto:hw_1@sdu.edu.cn) for WH.

**Supplementary table S1**

**Supplementary figures S1-S3**

**Table S1. Strains, plasmids, and primers used in the study**

|                                     | Relevant genotype or sequence (5'-3')                                             | Reference  |
|-------------------------------------|-----------------------------------------------------------------------------------|------------|
| <b><i>P. aeruginosa</i> strains</b> |                                                                                   |            |
| PAO1                                | Wide tvpe                                                                         |            |
| <i>PA2771</i> mutant                | PAO1 $\Delta$ <i>PA2771</i>                                                       | This study |
| <b><i>E. coli</i> strains</b>       |                                                                                   |            |
| DH5 $\alpha$                        | Wide tvpe                                                                         |            |
| BL21(DE3)                           | Wide tvpe                                                                         |            |
| <b>Plasmids</b>                     |                                                                                   |            |
| pEX18 Gm                            | Suicide cloning vector, oriT+, sacB+, Gm <sup>r</sup>                             | 26         |
| pKO2771                             | <i>PA2771</i> knockout construct in pEX18, Gm <sup>r</sup>                        | This study |
| pRK2013                             | Helper plasmids, ColE1, oriR, Tra, Mob, Km <sup>r</sup>                           | 53         |
| pUCP18                              | <i>E. coli-P. aeruginosa</i> expression vector, Ap <sup>r</sup> , Cb <sup>r</sup> | 54         |
| pGL01                               | Expression vector, modified by pET15b, Ap <sup>r</sup>                            | This study |
| pPA2771                             | <i>PA2771</i> in pUCP18, Ap <sup>r</sup> , Cb <sup>r</sup>                        | This study |
| pPA2771C                            | <i>PA2771</i> (residues 173-341) in pUCP18, Ap <sup>r</sup> , Cb <sup>r</sup>     | This study |
| pPGL1                               | <i>PA2771</i> in pGL01, Ap <sup>r</sup>                                           | This study |
| pPGL173                             | <i>PA2771</i> (residues 173-341) in pGL01, Ap <sup>r</sup>                        | This study |
| <b>Primers</b>                      |                                                                                   |            |
| KO2771UP5                           | CCGGAATTCGGGACTGTCGGCGAAT                                                         |            |
| KO2771UP3                           | GGGCTGGAGGACTAGCCCTGGGAGCTCACTG<br>GATCCTGATCACGGTGGAGA                           |            |
| KO2771DN5                           | CCACCGTGATCAGGATCCAGTGAGCTCC<br>CAGGGCTAGTCCTCCAGCCCTGC                           |            |
| KO2771DN3                           | CCCAAGCTTCGATAGGCGGGCGCC                                                          |            |
| KO2771S5                            | CGCATTCACCCAGATTGA                                                                |            |
| KO2771S3                            | CCGAACACGATCACCTGCTGGATAA                                                         |            |
| PA2771- <i>Bam</i> HI-F             | ATAGGATCCATGCTCGCCTGCCCCCTC                                                       |            |
| PA2771- <i>Xho</i> I-3T-R           | ACGTCACTCGAGTCAGACGCTGACCACCCGG<br>TT                                             |            |
| PA2771-173 -<br><i>Bam</i> HI-F     | ATA GGA TCC GAG ATC GAC CGG GAG                                                   |            |
| PA2771-341-<br><i>Hind</i> III-R    | CCCAAGCTTTCAGACGCTGACCACCCGGTT                                                    |            |

Gm<sup>r</sup>, gentamicin resistance; Tc<sup>r</sup>, tetracycline resistance; Ap<sup>r</sup>, ampicillin resistance; Cb<sup>r</sup>, carbenicillin resistance; Km<sup>r</sup>, kanamycin resistance.

## References

1. Hoang TT, Karkhoff-Schweizer RR, Kutchma AJ, & Schweizer HP (1998) A broad-host-range Flp-FRT recombination system for site-specific excision of chromosomally-located DNA sequences: application for isolation of unmarked *Pseudomonas aeruginosa* mutants. (Translated from eng) *Gene* 212(1):77-86 (in eng).
2. Figurski DH & Helinski DR (1979) Replication of an origin-containing derivative of plasmid RK2 dependent on a plasmid function provided in trans. (Translated from eng) *Proc Natl Acad Sci U S A* 76(4):1648-1652 (in eng).
3. Yanisch-Perron C, Vieira J, & Messing J (1985) Improved M13 phage cloning vectors and host strains: nucleotide sequences of the M13mp18 and pUC19 vectors. (Translated from eng) *Gene* 33(1):103-119 (in eng).

**Figure S1 Binding of cAMP, cGMP and c-di-GMP to Dcsbis analyzed by ITC.**

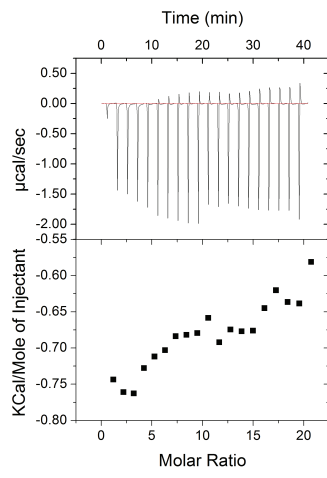

**cAMP**

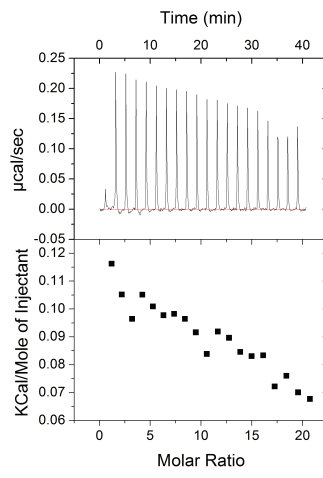

**cGMP**

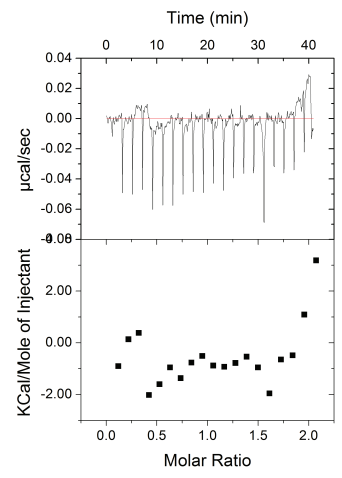

**c-di-GMP**

Figure S2 Multiple sequence alignment of the GAF domains from different proteins.

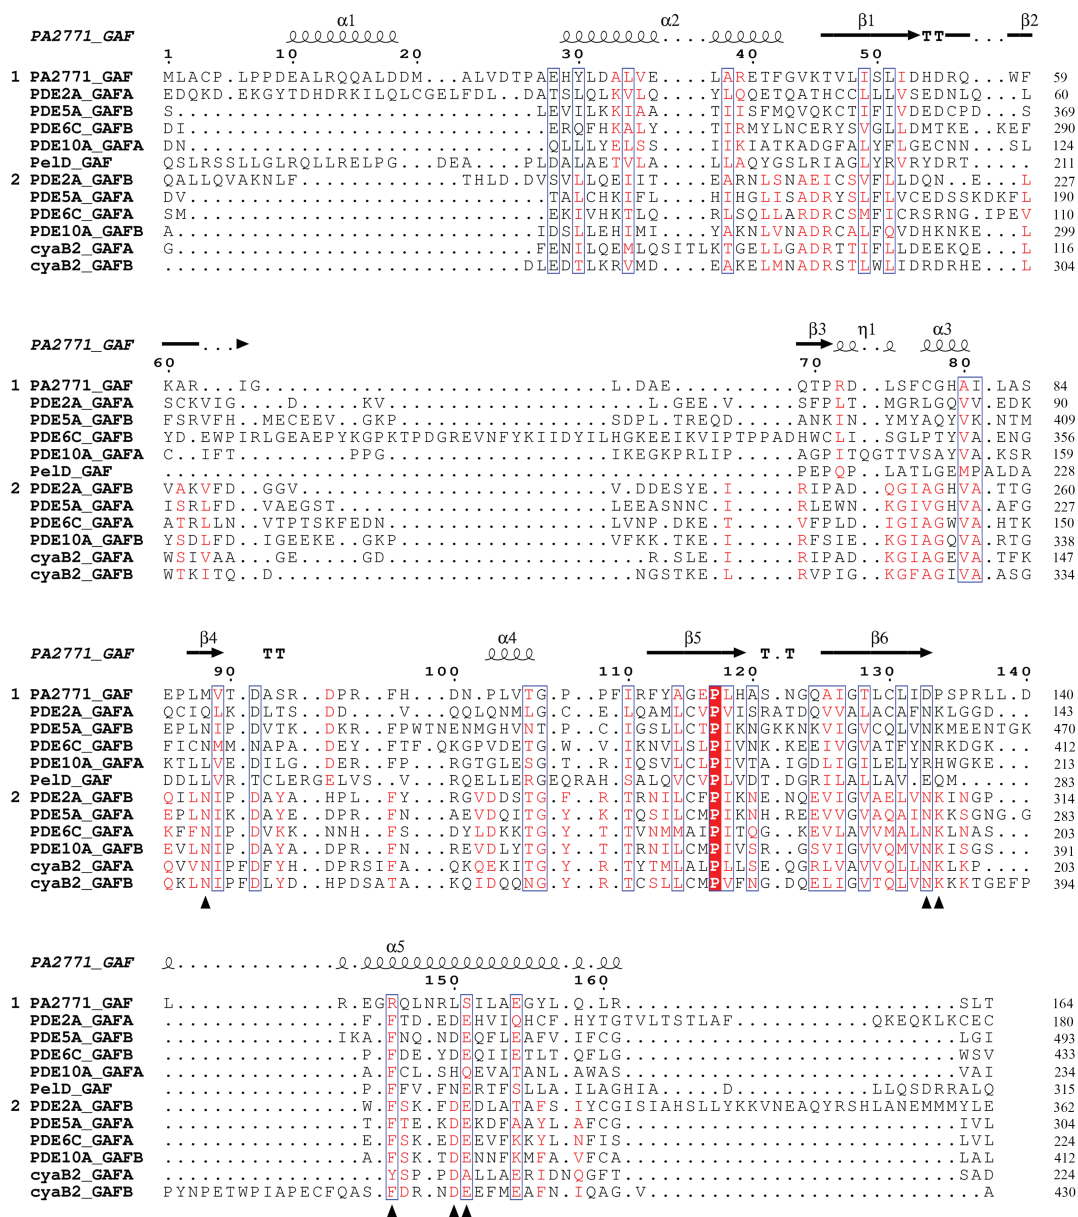

### Figure S3

## Sequence alignment of the protecting loop region through different *Pseudomonas* species

protecting loop

|                                                 |     |         |   |      |     |      |    |     |
|-------------------------------------------------|-----|---------|---|------|-----|------|----|-----|
| <i>Pseudomonas_aeruginosa</i> /1-341            | 119 | HASNGQA | I | GTLC | L   | IDPS | PR | 137 |
| <i>Pseudomonas_putida</i> _HB3267/1-345         | 119 | RAGNGKA | I | GTLC | MFD | PRPR |    | 137 |
| <i>Pseudomonas_nitroreducens</i> /1-347         | 119 | RAGNGQA | I | GTLC | MVD | PRPR |    | 137 |
| <i>Pseudomonas_mosselii</i> _SJ10/1-345         | 119 | RAGNGKA | I | GTLC | MFD | PQPR |    | 137 |
| <i>Pseudomonas_thermotolerans</i> /1-342        | 119 | RDASGM  | I | LTLC | LLD | TTPR |    | 137 |
| <i>Pseudomonas_mendocina</i> _S5.2/1-345        | 119 | RDVNGMP | L | GTLC | VAD | PKPR |    | 137 |
| <i>Pseudomonas_pseudoalcaligenes</i> _AD6/1-345 | 119 | HDAEGVP | L | GTLC | LAD | PKAR |    | 137 |
| <i>Pseudomonas_sp._H1h</i> /1-321               | 119 | QVSDGSK | L | GTLC | L   | IDTK | PR | 137 |
| <i>Pseudomonas_fluorescens</i> _F113/1-324      | 119 | GLEDGSK | L | GTLC | LLD | TRPR |    | 137 |

#### Alignment of the protecting loop through different *Pseudomonas* species

color code:

green: >40% conservation

yellow: >50% conservation

orange: >70% conservation

red: identical
